# Supplementary material
Source: HighWire-hosted journal article supplement (https://www.jneurosci.org/highwire/filestream/601671/field_highwire_adjunct_files/0/Supplemental_Table.pdf)
Supplement: Supplemental_Table.pdf [file Supplemental_Table.pdf]

**Supplementary Table 1.** Modification of the *Sema1a*-overexpression-induced axonal hyper-fasciculation phenotype by reducing the dosage of other genes

| Genotype                                                                         | Number of axons or axon bundles <sup>a</sup> | Number of hemispheres examined |
|----------------------------------------------------------------------------------|----------------------------------------------|--------------------------------|
| <i>wt</i>                                                                        | 30.8 ± 6.7 <sup>b</sup>                      | 25                             |
| <i>GMR-GAL4, UAS-semala/+</i>                                                    | 17.6 ± 2.8                                   | 21                             |
| <i>2XGMR-GAL4,UAS-semala</i>                                                     | 8.0 ± 3.4                                    | 21                             |
| <i>GMR-GAL4, UAS-semala; abl<sup>2</sup>/+</i>                                   | 18.0 ± 3.6                                   | 21                             |
| <i>GMR-GAL4, UAS-semala; bif<sup>R47</sup>/+</i>                                 | 19.8 ± 3.6                                   | 18                             |
| <i>GMR-GAL4, UAS-semala; chic<sup>221</sup>/+</i>                                | 19.5 ± 5.3                                   | 18                             |
| <i>GMR-GAL4, UAS-semala; capu<sup>M732</sup>/+</i>                               | 19.2 ± 5.7                                   | 19                             |
| <i>GMR-GAL4, UAS-semala; cdc42<sup>3</sup>/+</i>                                 | 18.7 ± 3.9                                   | 24                             |
| <i>GMR-GAL4, UAS-semala; dock<sup>P2</sup>/+</i>                                 | 19.1 ± 4.5                                   | 11                             |
| <i>GMR-GAL4, UAS-semala; ena<sup>GC1</sup>/+</i>                                 | 18.7 ± 4.3                                   | 18                             |
| <i>GMR-GAL4, UAS-semala; klar<sup>mBX5</sup>/+</i>                               | 21.4 ± 6.4                                   | 18                             |
| <i>GMR-GAL4, UAS-semala; paki<sup>6</sup>/+</i>                                  | 19.8 ± 3.9                                   | 22                             |
| <i>GMR-GAL4, UAS-semala; nervy<sup>1</sup>/+</i>                                 | 18.1 ± 2.4                                   | 15                             |
| <i>GMR-GAL4, UAS-semala; Rac1<sup>J11</sup>Rac2<sup>Δ</sup>Mtl<sup>Δ</sup>/+</i> | 17.0 ± 3.2                                   | 23                             |
| <i>GMR-GAL4, UAS-semala; Rho1<sup>E3.10</sup>/+</i>                              | 7.3 ± 4.8 <sup>c</sup>                       | 23                             |

<sup>a</sup> The number of axons or axon bundles that separated from neighboring bundles at the region between lamina and medulla were counted. The data was normalized with the row number of R-cell clusters in the eye disc.

<sup>b</sup> Standard deviation

<sup>c</sup> Compared to *Sema1a* overexpression alone, reducing the dosage of *Rho1* by 50% in larvae overexpressing *Sema1a* significantly enhanced the hyper-fasciculation phenotype ( $P < 0.0001$ ).
